# Supplementary material for: Bacterial cellulose/reduced graphene oxide bilayer films for moist-electric power generation
Source: Royal Society of Chemistry journal article supplement (doi:10.1039/d5ta00110b), 2025-01-01
Supplement: d5ta00110b2.pdf [file d5ta00110b2.pdf]

## Supplementary Information

### **Bacterial cellulose/reduced graphene oxide bilayer films for moist-electric power generation**

Xinye Li, Rui Zhang, Xin Ai, Ping Tang, Hai Wang\*, Yuezhen Bin\*

*Department of Polymer Science and Engineering, School of Chemical Engineering, Dalian  
University of Technology, Dalian 116024, PR China*

\*Corresponding authors.

E-mail addresses: wanghai\_polymer@sina.com (H. Wang), binyz@dlut.edu.cn (Y. Bin).

# 1 Supplementary Figures

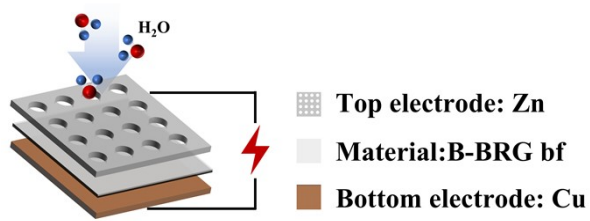

Fig. S1 Assembly diagram of B-BRG bf-based MEG

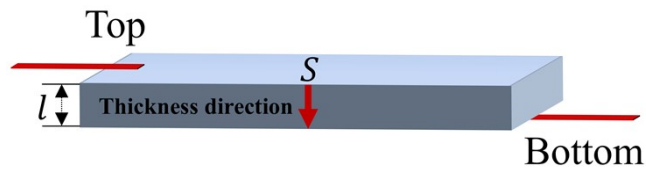

Fig. S2 Schematic diagram for conductivity tests in the thickness direction of films

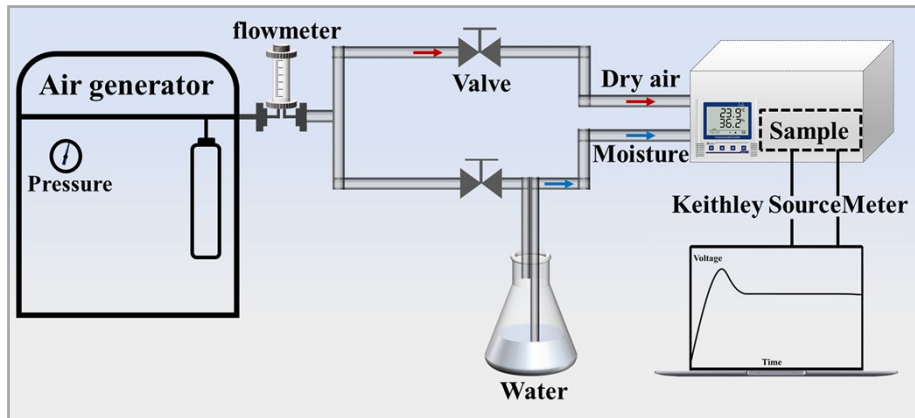

Fig. S3 Schematic diagram of homemade humidity control system

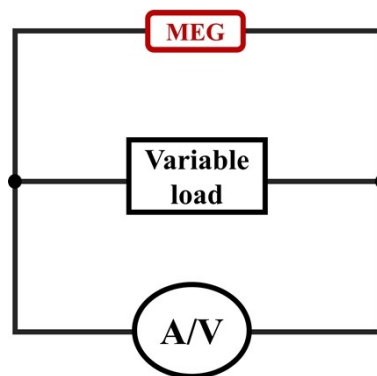

Fig. S4 Schematic diagram of the testing circuit for  $P_{mo}$ .

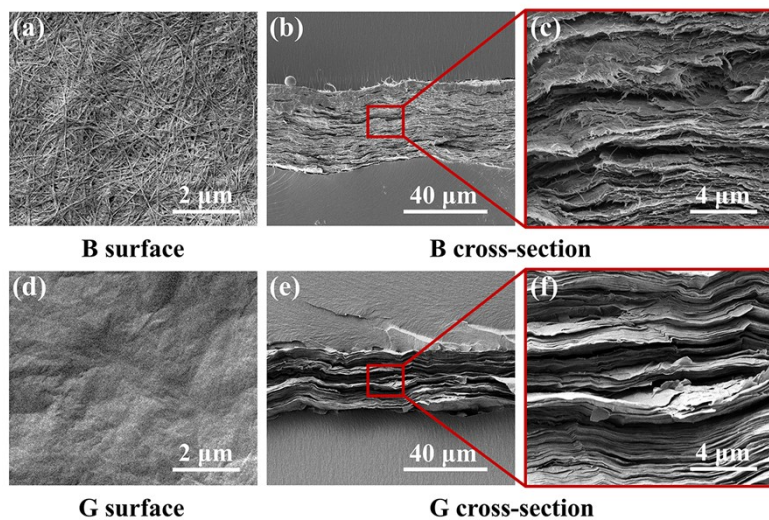

**Fig. S5** SEM images of (a-c) B and (d-f) G films surface and cross-section

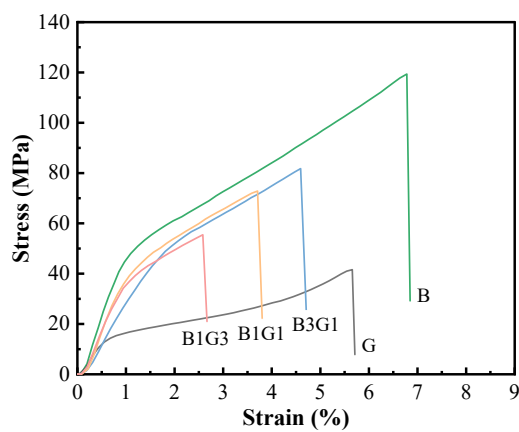

**Fig. S6** Stress-strain curve of B, G, and BRG films

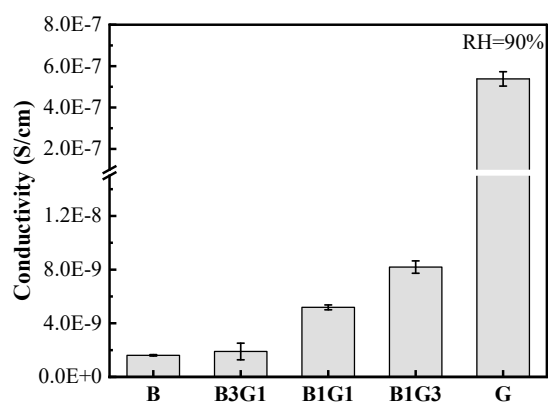

**Fig. S7** Conductivity of B, G, and BRG films

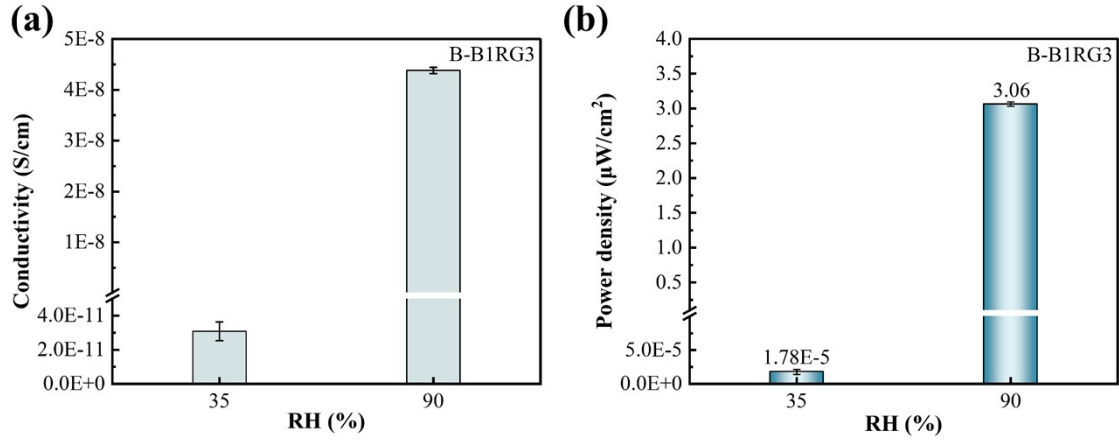

Fig. S8 (a) Conductivity and (b)  $P_{mo}$  of B-B1RG3 under different humidity conditions

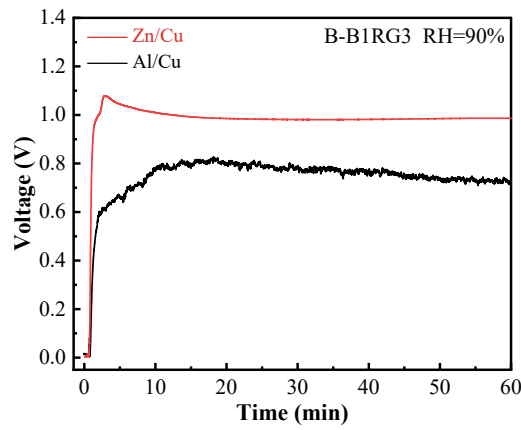

Fig. S9 Dynamic voltage of the B-B1RG3 MEG with Zn/Cu and Al/Cu electrode

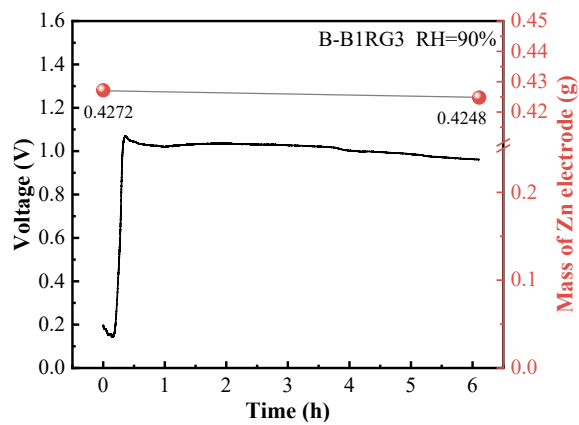

Fig. S10 Dynamic voltage and Zn electrode mass changes of the B-B1RG3 MEG

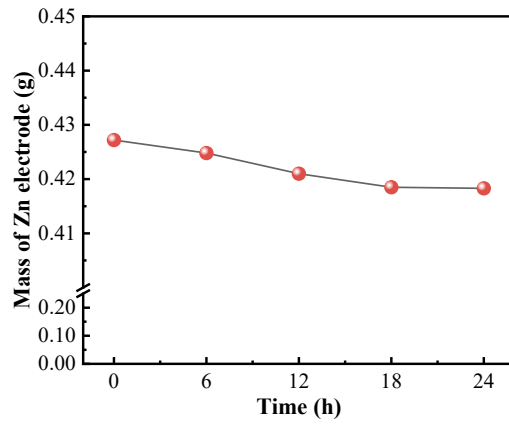

**Fig. S11** The mass changes of the Zn electrode

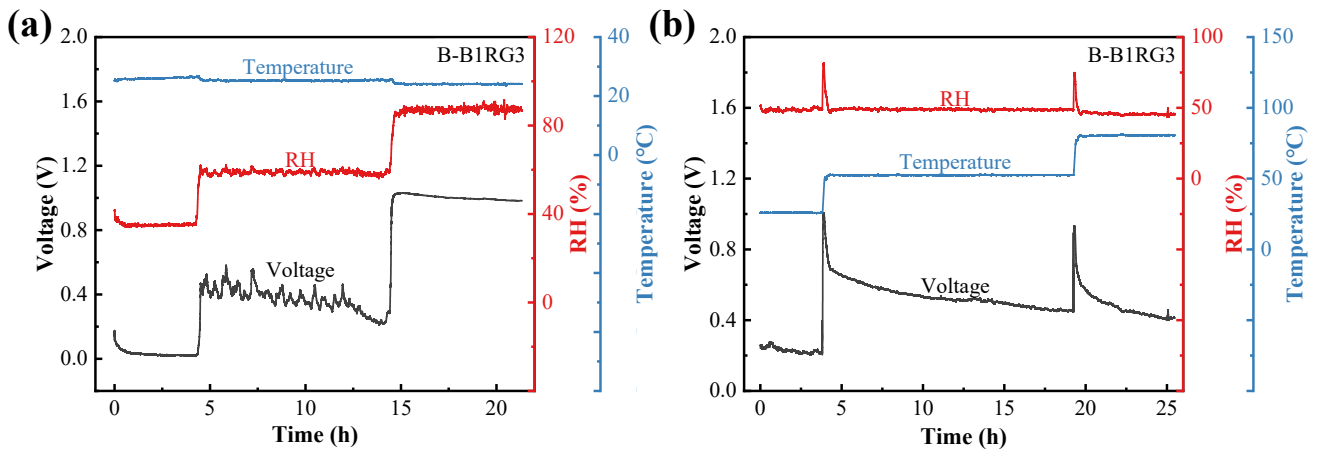

**Fig. S12** Dynamic voltage of the B-B1RG3 MEG in different (a) RH and (b) temperature environments.

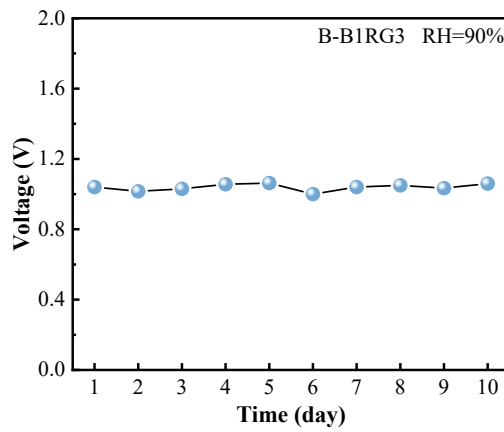

**Fig. S13** Voltage output stability of the B-B1RG3 MEG within 10 days

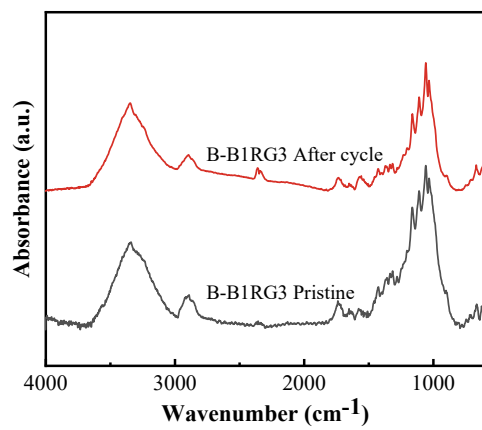

**Fig. S14** FTIR of B-B1RG3 film before and after 3 cycles under dry air and moisture (1 h) stimulation.

## 2 Supplementary Tables

**Table S1** The compositions of different BG mf and B-BG bf.

| Type    | Sample | Total solution mass (g) | Bottom (B)layer solution mass (g) | Top (BG) layer solution mass (g) | Thickness ( $\mu\text{m}$ ) |
|---------|--------|-------------------------|-----------------------------------|----------------------------------|-----------------------------|
| BG mf   | B      | 30                      | 30                                | -                                | $55 \pm 1$                  |
|         | G      | 30                      | -                                 | 30                               | $45 \pm 1$                  |
|         | B3G1   | 30                      | -                                 | 30                               | $60 \pm 1$                  |
|         | B1G1   | 30                      | -                                 | 30                               | $50 \pm 1$                  |
|         | B1G3   | 30                      | -                                 | 30                               | $47 \pm 1$                  |
| B-BG bf | B-B3G1 | 30                      | 15                                | 15                               | $58 \pm 1$                  |
|         | B-B1G1 | 30                      | 15                                | 15                               | $48 \pm 1$                  |
|         | B-B1G3 | 30                      | 15                                | 15                               | $45 \pm 1$                  |
|         | B-B1G3 | 20                      | 10                                | 10                               | $33 \pm 1$                  |
|         | B-B1G3 | 40                      | 20                                | 20                               | $60 \pm 1$                  |

**Table S2** EDS results of BRG mf

| Relative atomic ratio (%) | B     | G     | B3RG1 | B1RG1 | B1RG3 |
|---------------------------|-------|-------|-------|-------|-------|
| C                         | 56.42 | 63.70 | 61.47 | 64.11 | 67.66 |
| O                         | 43.58 | 36.30 | 38.53 | 35.89 | 32.34 |

**Table S3** EDS results of B-BRG bf

| Relative atomic ratio (%) | B-B3RG1 | B-B1RG1 | B-B1RG3 |
|---------------------------|---------|---------|---------|
| C                         | 56.16   | 59.58   | 69.60   |
| O                         | 43.84   | 40.42   | 30.40   |
